# Supplementary material for: Synthesis of amorphous carbon functionalized Fe3O4 nanoparticles as a smart nanosorbent for organic dyes removal
Source: Royal Society of Chemistry journal article supplement (doi:10.1039/d2nj01246d), 2022-01-01
Supplement: d2nj01246d1.pdf [file d2nj01246d1.pdf]

***Supplementary Material***

**Synthesis of Amorphous Carbon Functionalized Fe<sub>3</sub>O<sub>4</sub>  
Nanoparticles as A Smart Nanosorbent for Organic Dyes  
Removal**

**Hoang V. Tran,<sup>a,\*</sup> Oanh T. K. Do,<sup>a</sup> Nghia Duc Nguyen,<sup>a</sup> Chinh Dang Huynh<sup>a</sup>**

*<sup>a</sup> School of Chemical Engineering, Hanoi University of Science and Technology, Hanoi, Vietnam*

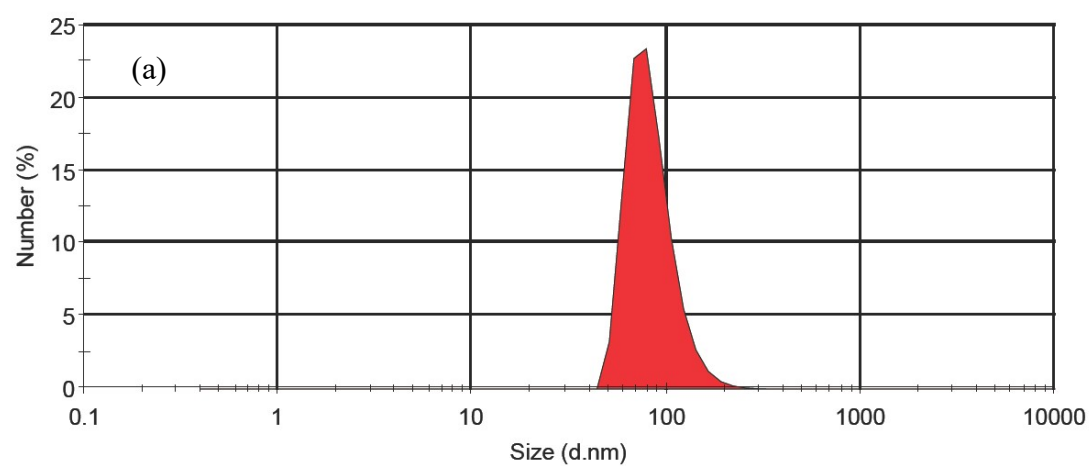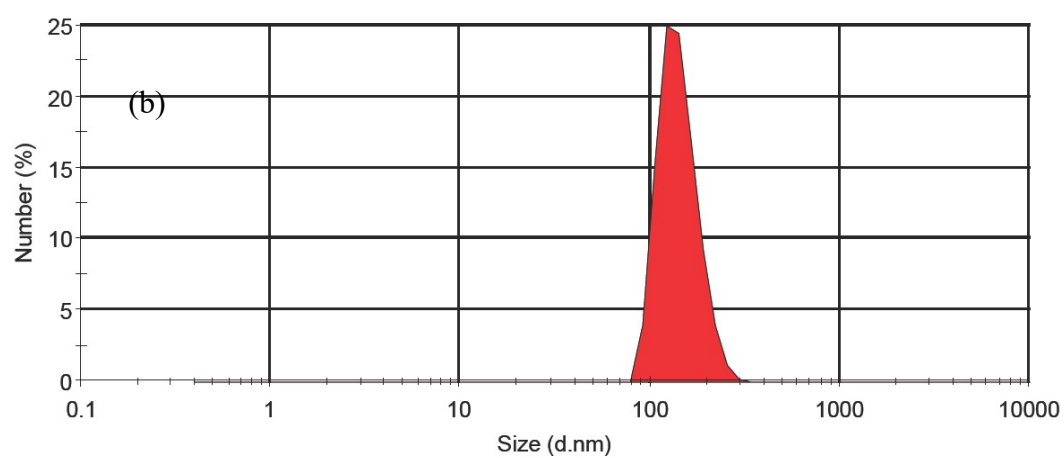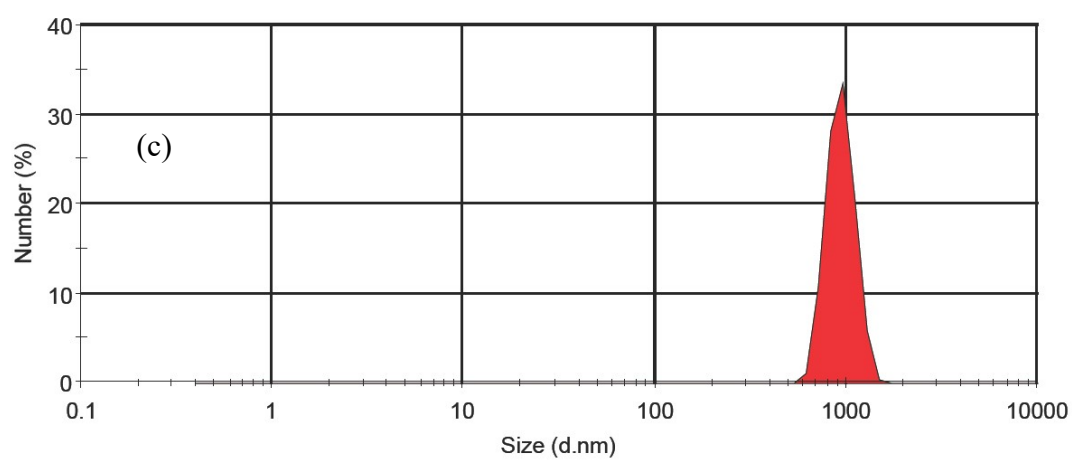

**Figure SI.1.** DLS of (a)CCF100, (b) CCF105 and (c) CCF110 samples

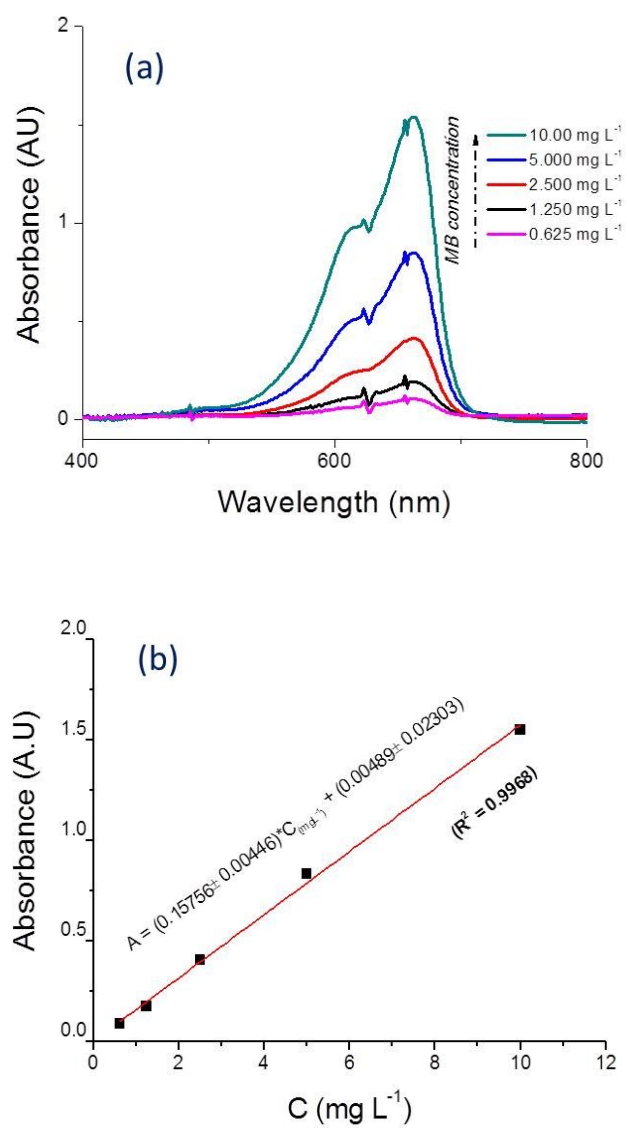

**Figure SI.2.** (a) UV-Vis spectra of MB solution at different concentrations, (b) calibration curve for determining MB concentration

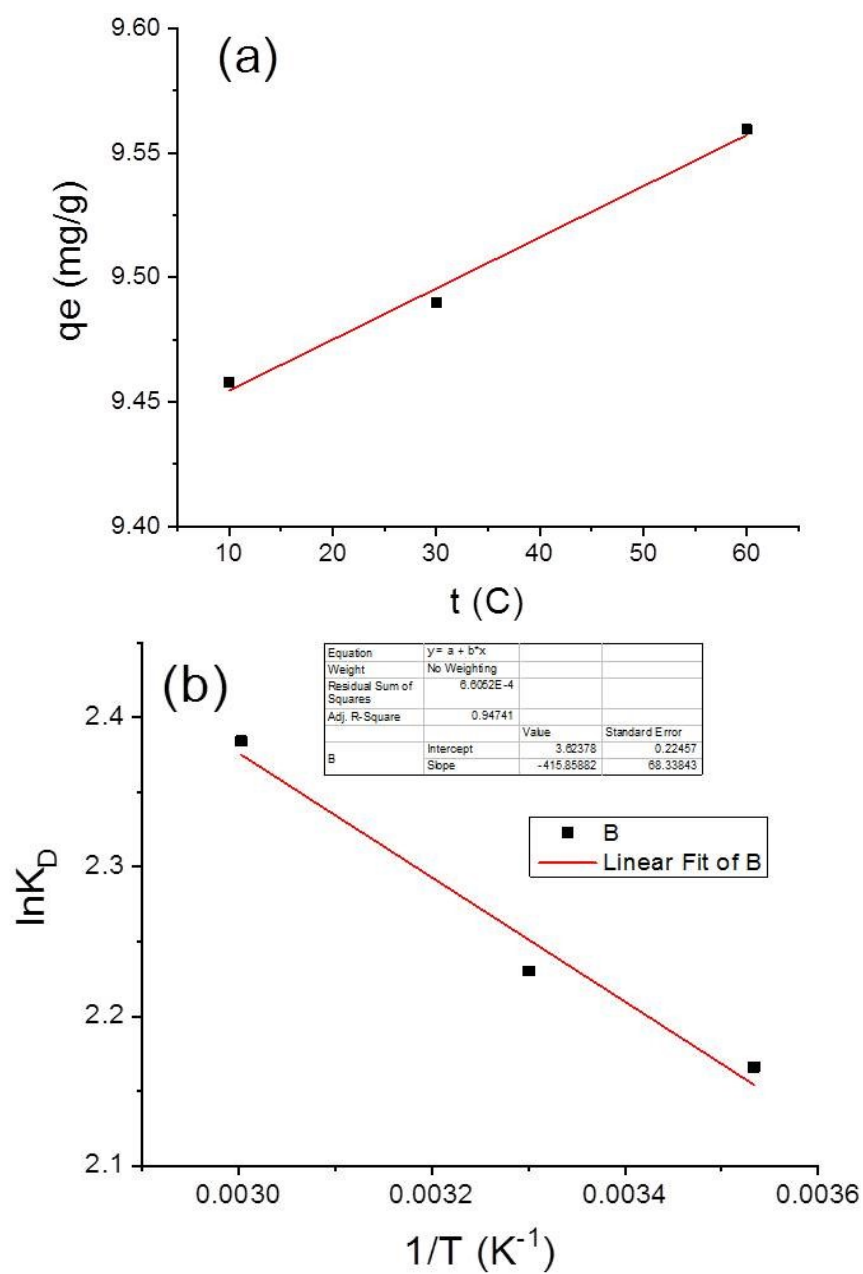

**Figure SI.3.** Relationship curve between (a)  $q_e$  and  $T$ , (b)  $\ln K_D$  and  $1/T$ .

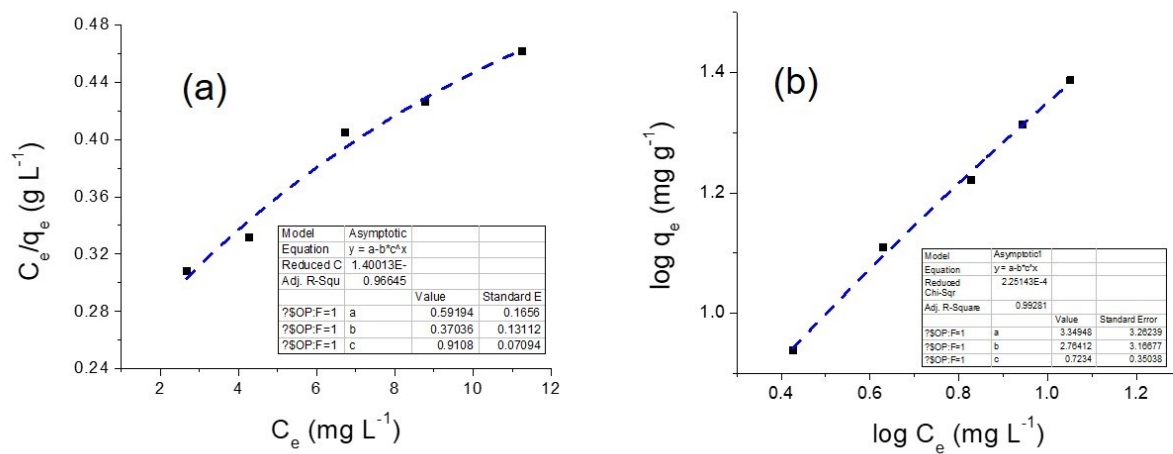

**Figure SI.4.** Nonlinear fit of (a) Langmuir and (b) Freundlich isotherm models of MB adsorption onto  $\text{Fe}_3\text{O}_4\text{@C}$  (sample CCF102 sample) adsorbent
